# Supplementary material for: Adsorption of polyelectrolytes onto the oppositely charged surface of tubular J-aggregates of a cyanine dye
Source: Springer Nature journal article supplement (doi:10.1007/s00396-019-04487-5), 2019-03-12
Supplement: MOESM1 [file 16544938]

**Supplementary Information**

Adsorption of polyelectrolytes onto oppositely charged surface of tubular J-aggregates of a cyanine dye

Omar Al-Khatib,† ‡ Christoph Böttcher, § Hans von Berlepsch, § Katherine Herman,† ‡
Sebastian Schön,†† Jürgen P. Rabe,†,‡ Stefan Kirstein.†*

† Institut für Physik, Humboldt-Universität zu Berlin

‡ IRIS Adlershof, Humboldt-Universität zu Berlin

§ Research Center of Electron Microscopy, Freie Universtät Berlin

†† Institut für Chemie, Technische Universität Berlin

AUTHOR EMAIL: kirstein@physik.hu-berlin.de

**Table of Contents**

[1. Optical spectra of bare C8S3 aggregates 3](#_Toc533164405)

[2. Dynamics of aggregate formation 3](#_Toc533164406)

[3. pH compatibility of C8S3 solutions 5](#_Toc533164407)

[4. Salt induced bundling of C8S3 aggregates 6](#_Toc533164408)

[5. Zeta potential measurements 8](#_Toc533164409)

[6. Absorption and emission spectra of PDDA covered aggregates 9](#_Toc533164410)

[7. Additional cryo-TEM images 10](#_Toc533164411)

[8. Staining of C8S3/PDADMAC complexes with CdTe nanoparticles 12](#_Toc533164412)

[9. Useful physical data of the polycations used 14](#_Toc533164413)

[References 14](#_Toc533164414)

# Optical spectra of bare C8S3 aggregates


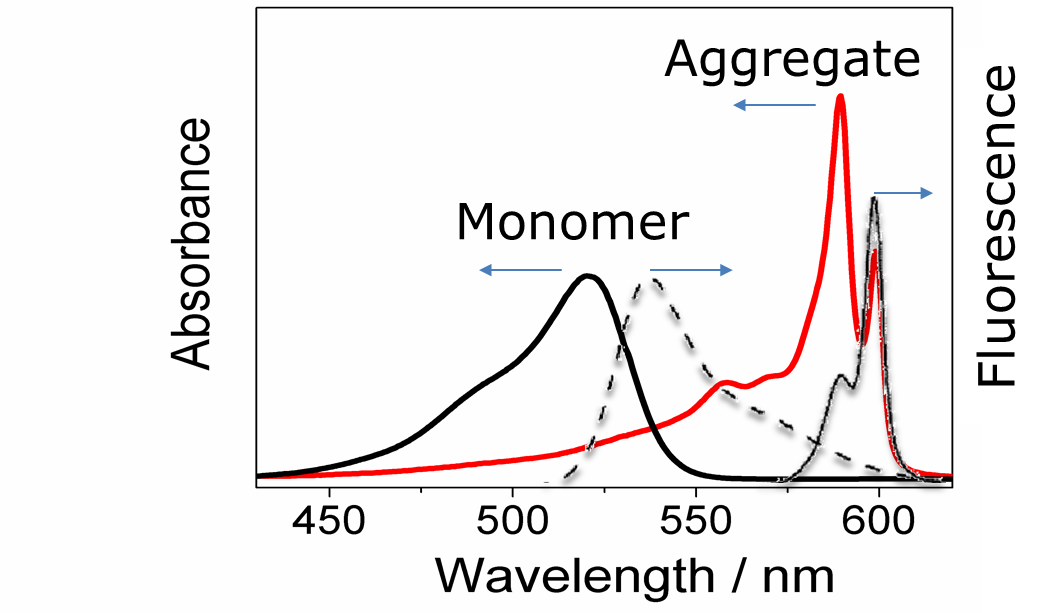


Figure S 1: Absorbance and fluorescence of a solution of C8S3 aggregates.

# Dynamics of aggregate formation

The aggregation process begins almost immediately upon addition of the methanol stock solution to water. However, over time scales of minutes and hours the absorption spectrum still undergoes changes with increasing absorption at the J-bands. This indicates continued formation of aggregates. In Figure S 2 and Figure S 3 the change of the absorption spectra after addition of methanol stock solution to water is shown.

| 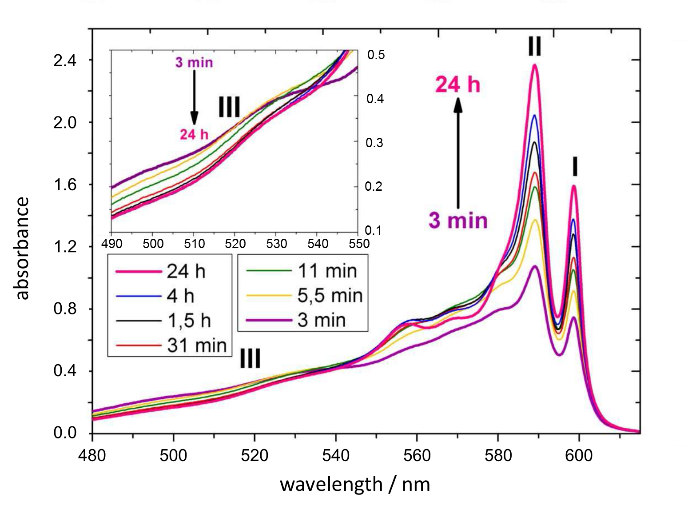 | 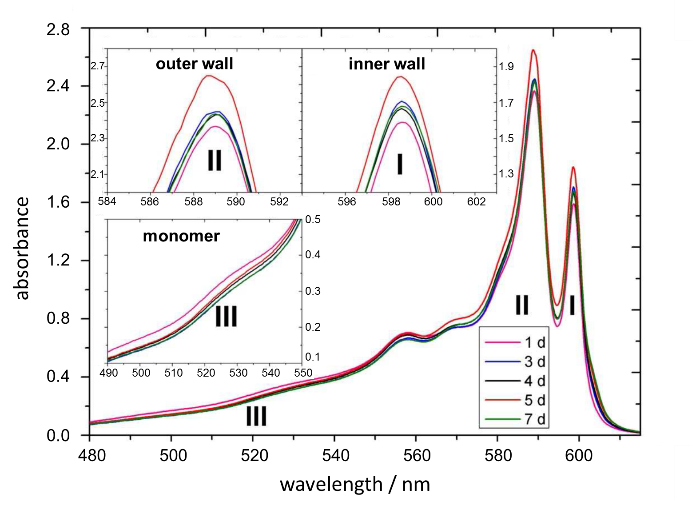 |
| --- | --- |

Figure S 2: Time series of absorption spectra taken for a 6.0·10-4 M solution of C8S3 recorded after addition of water to the methanol stock solution (2.9·10-3 M). The insets show magnifications of the respective areas of the total spectra.


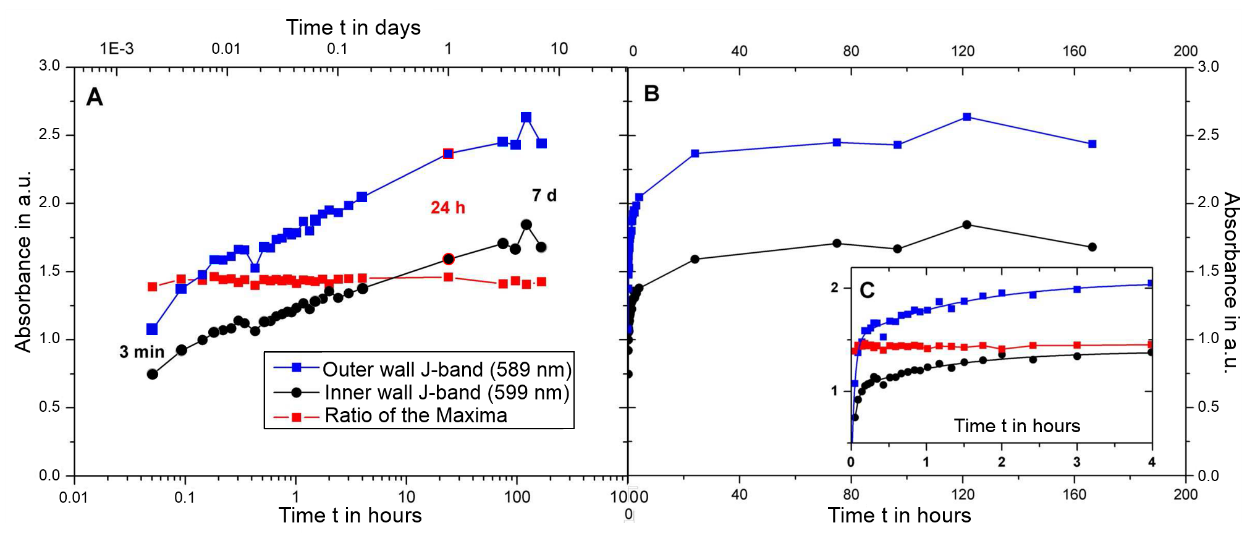


Figure S 3: Time evolution of the absorption of the inner wall band (599 nm) and the outer wall band (589 nm) and their ratio. (A) Plotted over log(t), (B) plotted linearly with time.

# pH compatibility of C8S3 solutions

The stability of the aggregates of C8S3 with regard to solution pH was monitored by their absorption spectra. The pH was varied by addition of HCl or NaOH. For the calculation of pH value it was assumed that the pure dye solution is at neutral pH of 7. The resulting spectra are shown in Figure S 4 and summarized in Figure S 5.

| 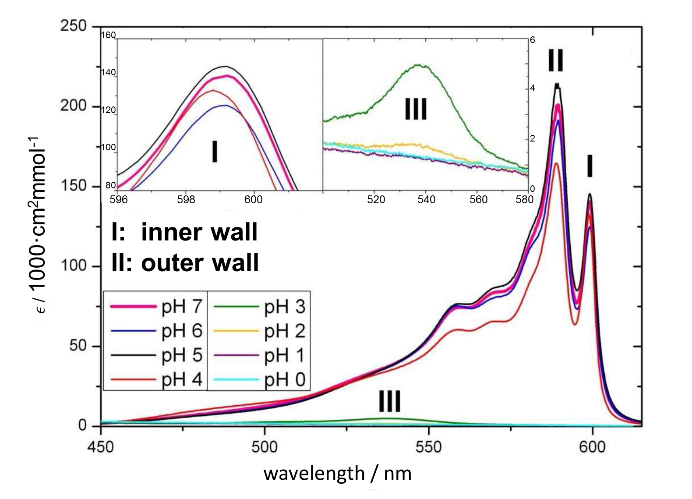 | 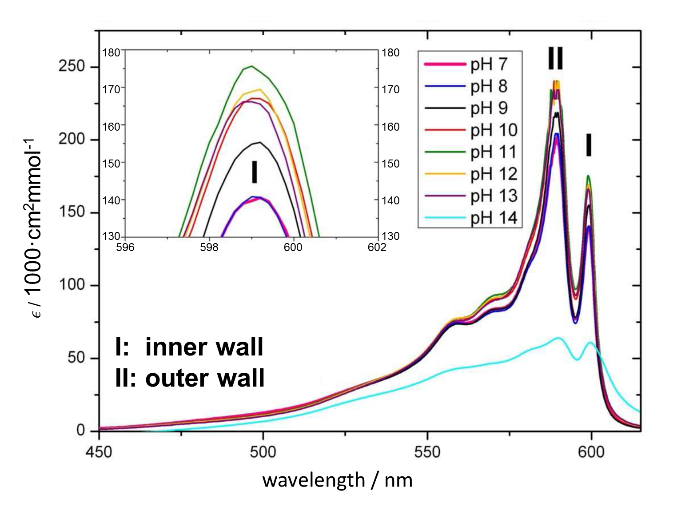 |
| --- | --- |

Figure S 4: Absorption spectra of a 3.1·10-4 M C8S3 solution at different pH values. Left: acidic range. The pH was calculated from the amount of HCl added. Right: basic range. The pH was calculated from the amount of NaOH added. (I) absorption peak of outer tube wall; (II) absorption peak of inner tube wall; (III) absorption of monomer.


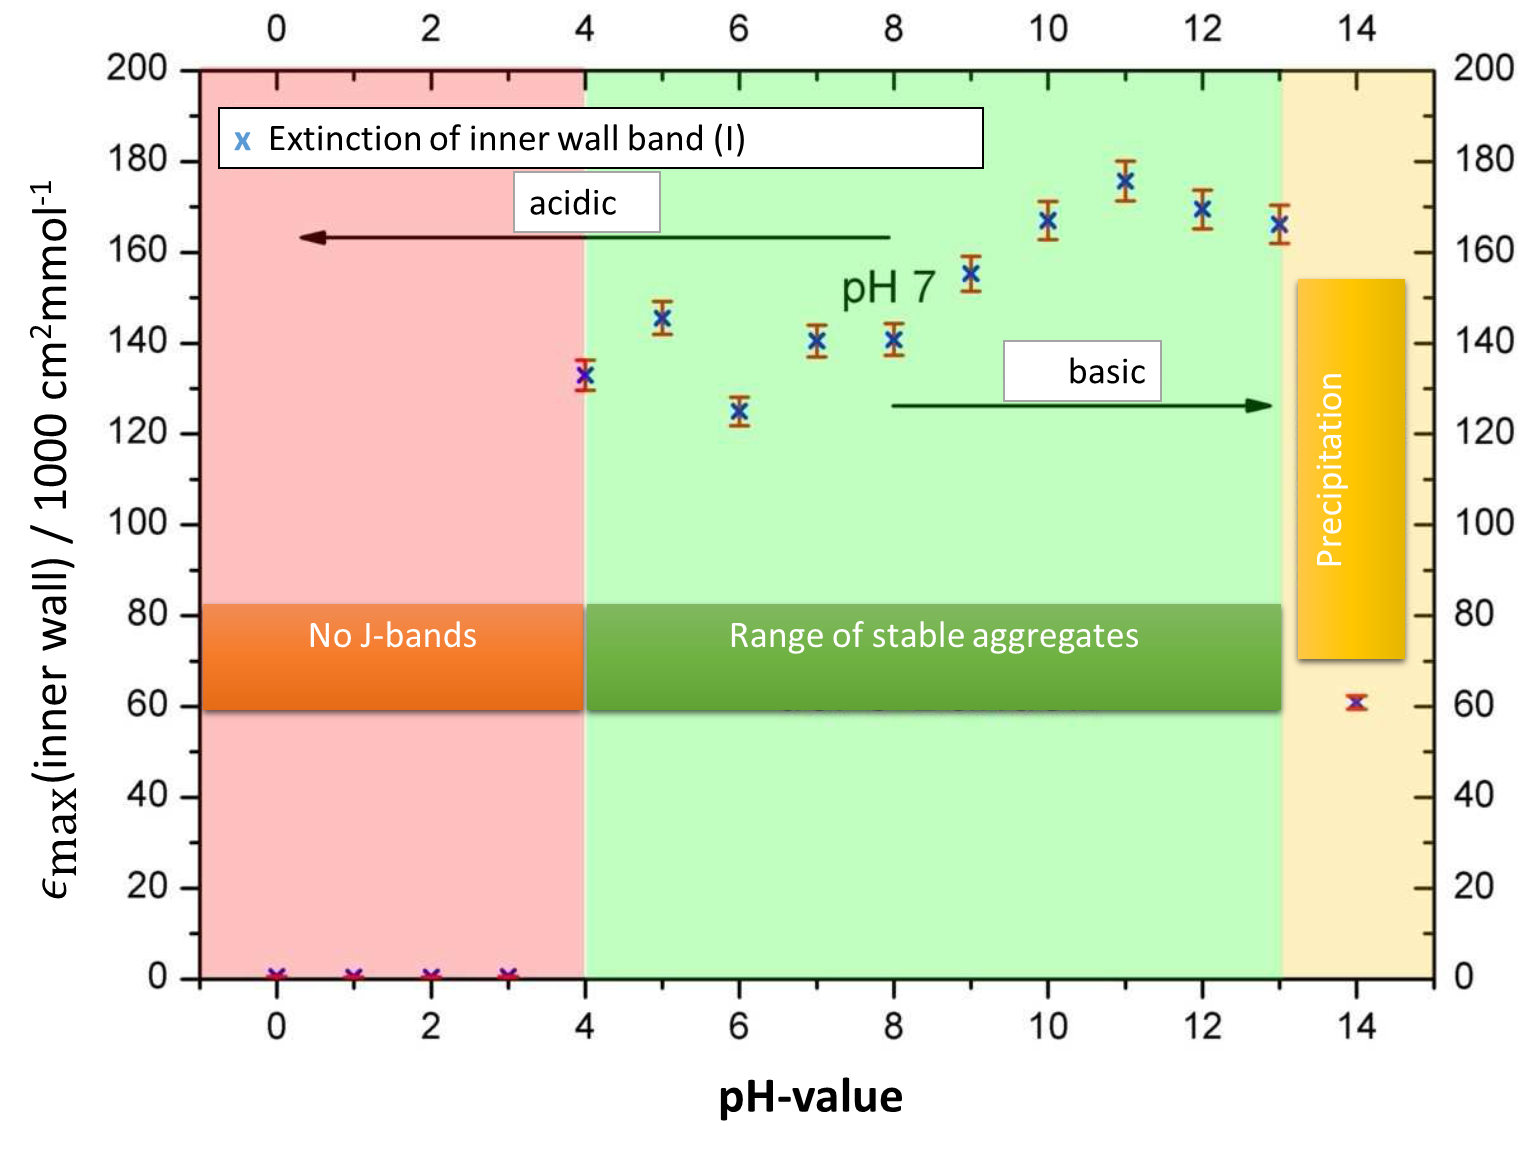


Figure S 5: Overview of the extinction coefficients of the absorption band at 599 nm (inner wall) for various pH values.

# Salt induced bundling of C8S3 aggregates

It has been reported previously that the tubular aggregates of C8S3 show a tendency to form bundles during aging over days or weeks 1 2. The formation of bundled aggregates is accompanied by characteristic changes of the absorption spectrum. A typical time series measured over a period of 11 days is shown in 6a. During the bundling process the inner wall peak at 599 nm is replaced by a peak at 603 nm while the outer-wall peak decreases until it is almost completely gone at later times (not shown here, but see 1 2).

It seems that the process of bundling of the tubular aggregates is similar to flocculation of colloidal suspensions as described by the DLVO theory 3. That would mean that initially the aggregates are kept at distance from each other due to electrostatic repulsion. Over time there is some probability that two aggregates overcome this electrostatic repulsion barrier by thermal motion and are attracted by short range van-der-Waals-forces. For pure C8S3 samples this process takes days or weeks.

According to the DLVO theory it should be possible to accelerate the bundling by lowering the electrostatic repulsion. This can be achieved by addition of salt since increasing ionic strength of the solvent lowers the range of electrostatic repulsion as described by the Debye screening length.

In 6b the development of the absorption spectra is shown for a solution of C8S3 with 10­2 M NaCl solution added. This ion concentration lowers the original Debye length of 17 nm, which is due to the counter ions of the dye, by about a factor of 10. Immediately after addition of the NaCl solution the absorption spectrum looks similar to the pure dye solution after 11 days. The bundling process then develops further during 5 days and achieves a stable condition over the following days. The final spectrum is identical to the one reported in 1 after up to 3 month storage time. This enhanced bundling process due to addition of salt was confirmed also for other salts and appeared to be even more effective for two-valent salts, as predicted from DLVO theory.

It was shown by Eisele et al. 1 that the bundling essentially removes the outer layer of the tubes, resulting in a structure of packed tubes that only consist of the slightly modified inner tube, sheathed by an outer layer that encloses the entire bundle. Therefore the process of bundle formation is much more complex than described by electrostatics only. The overcoming of the electrostatic repulsion as in case of flocculation is just the first step.

Bundling of aggregates was also observed when NaCl was added to a sample of C8S3 with PAH added. In Figure S 7 the time evolution of the absorption spectra of a sample with 10-5 M PAH after addition of 10-2 M of NaCl salt is shown. Note the similarity of the spectrum after 12 h for the PAH-coated aggregates (Figure S 7a) with that after 24 h for the pure aggregates (Figure S 6b). The bundling is confirmed by cryo-TEM images, see Figure S 7b. Only very few single tube aggregates are found, the majority shows bundling. Although only the minority of the aggregates is expected to be covered by PAH this result is remarkable since it is in contrast to the previous finding for the similar dye C8O3, having carboxyl end groups instead of the sulfopropyl groups of C8S3, where a coverage with poly(vinyl alcohol) (PVA) stabilizes isolated aggregates and prevents bundling.4


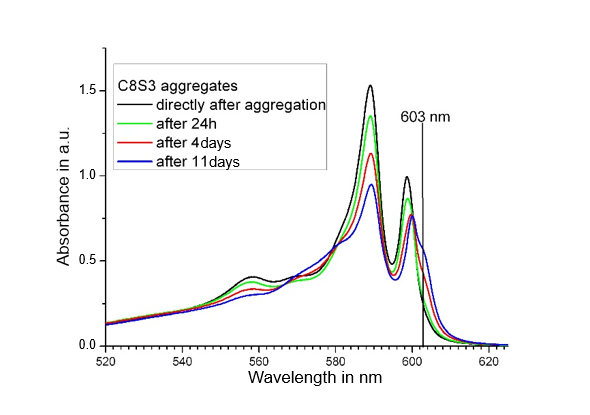

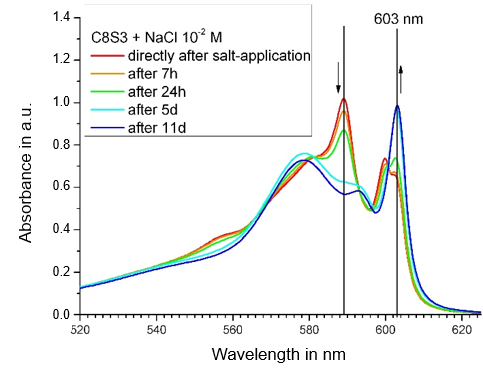


a

b

Figure S 6: Absorption spectra of a 3.3·10-4 M solution of C8S3 measured at certain time steps over a period of time of 11 days. (a) Shows a pure solution of C8S3, while (b) shows a solution of same concentration but with 10-2 M NaCl added. The new position of the inner wall peak at 603 nm that is characteristic for bundles, as well as the position of the outer wall peak at 589 nm are indicated.


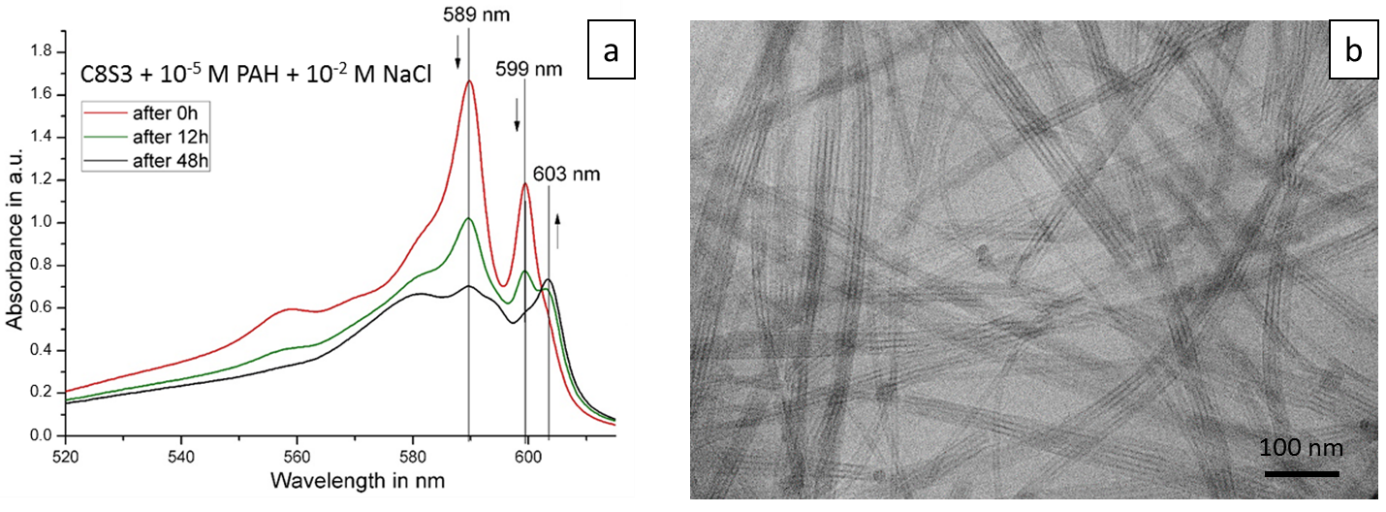


Figure S 7: a) Time sequence of absorption spectra of a sample of C8S3 and 10-5 M PAH recorded after addition of a 10-2 M NaCl solution. b) Cryo-TEM image of C8S3 and 10-5 M PAH with additional 10-2 M NaCl solution, taken 48 h after addition of the salt. Almost all tubular aggregates appear in bundles.

# Zeta potential measurements

Measurements of the zeta-potential were carried out on a Zetasizer Nano ZS analyzer with integrated 4 mW He-Ne laser, λ = 633 nm (Malvern Instruments Ltd, U.K.). This device is able to detect particles in sizes from 0.6 up to 6 µm. Measurements were performed in phosphate buffer to determine the surface charge of the aggregates and coated aggregates. 100 ml buffer was prepared using 4.27 ml of 0.02 M KH3PO4 and 30.49 ml of 0.01 M Na2HPO4. An additional 65.24 ml of pure Milli-Q water (Millipak Express 20, 0.22 µm Flter) was added to fill the volume, resulting in a buffer pH-value of 7.6. All measurements were carried out at 25 °C using folded capillary cells (DTS 1060) in triplicate.

The zeta-potential obtained for pure C8S3 aggregates and for aggregates mixed with polycation solutions are shown in Figure S 8. For the uncoated aggregate solutions a mean zeta potential of -60 mV was found with a spread of ± 20 mV. The potential reverses sign if polycations are added and values ranging from +35 mV ± 10 mV for PEI to +62 mV ± 10 mV for PDADMAC and +68 mV ± 20 mV for PAH were found. The absolute value of the surface potentials should not be assigned any great importance since the instrument is in principle designed to detect signals from spherical particles larger than 600 nm. Here, we have cylindrical objects with very small diameter (13 nm) but length exceeding microns. The tubes deliver a sufficiently large scattering signal that allows measurement, but the conversion of the signal into a numerical value of the zeta potential is probably not correct. Also the buffer solution added to the aggregates may induce bundling that also contributes to the signal strength. However, the sign of the potential is a meaningful quantity and demonstrates charge reversal upon adsorption of the polycations.

**
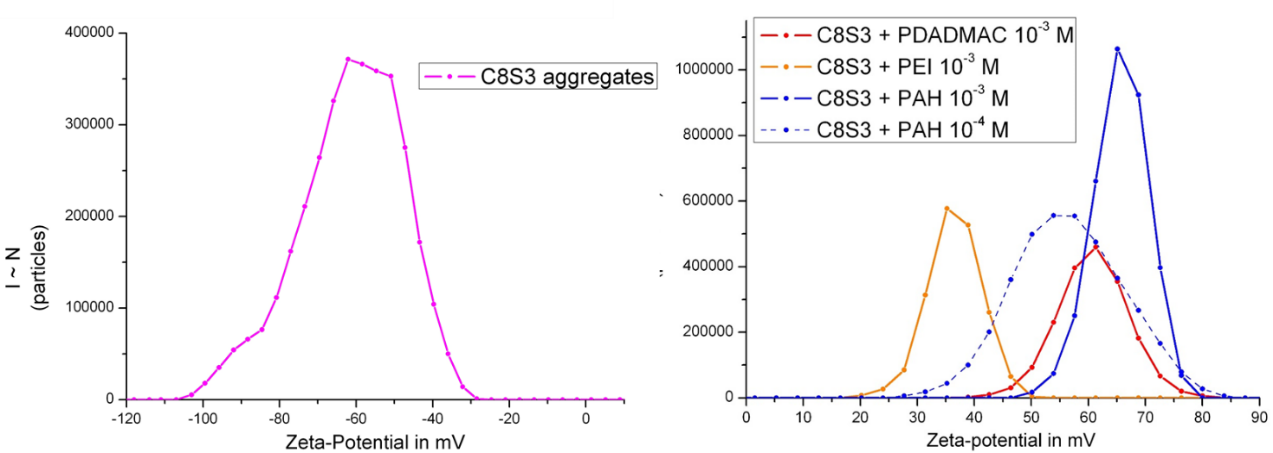
**

Figure S 8: Zeta-potential plot of pure C8S3 aggregate solution and of C8S3/polycation mixtures. The polycation solutions were mixed with their respective concentration iin a 1:1 volume ratio with the dye solution of 3.3·10-4 M. Each colour represents coating with a certain polyelectrolyte. All polyelectrolyte treated C8S3-solutions provide positive potentials.

# Absorption and emission spectra of PDDA covered aggregates

Figure S 9: Absorption and emission spectrum of C8S3 aggregates covered by PDADMAC. Concentration of PDADMAC was 7·10-5 M, concentration of C8S3 was 3.3·10‑4 M.

# Additional cryo-TEM images


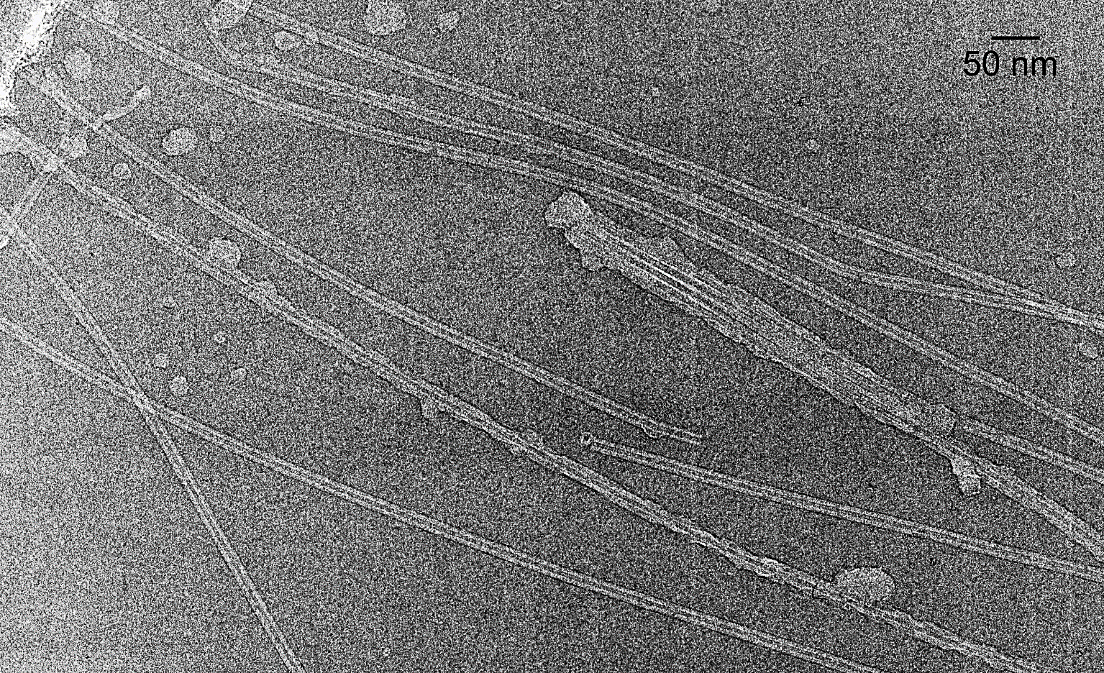


**a**

**c**

**b**


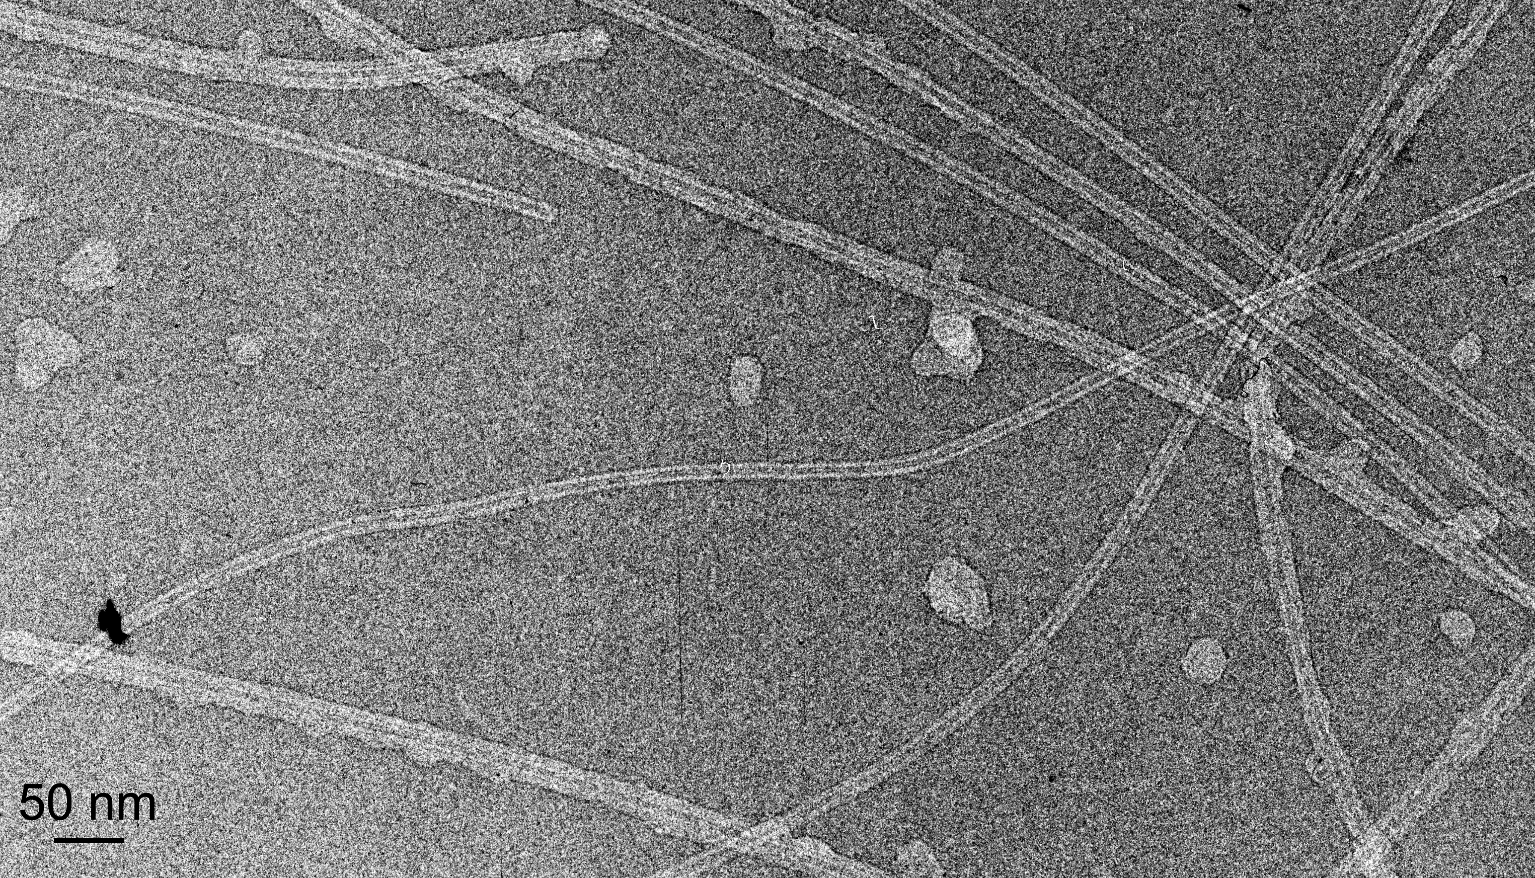

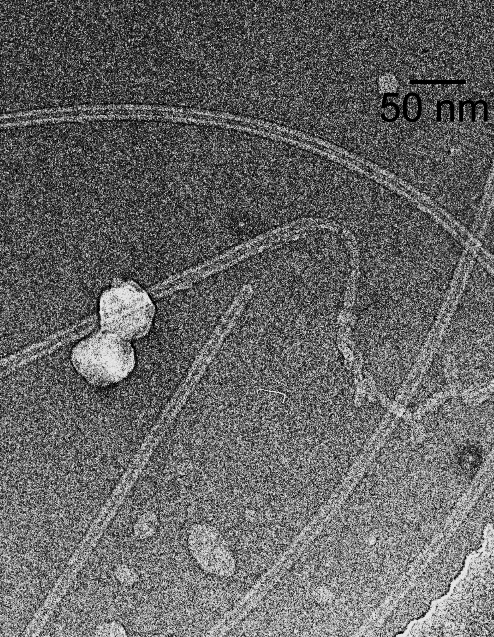


Figure S10 (a) and (b): Overview images of 3.3·10-4 M C8S3 aggregate solution after addition of 10‑5 M solution of PAH in equal volume. The insert (c) shows part of an aggregate where the tubular structure is destroyed. Its typical width nevertheless has roughly the size of the original aggregates. We call this type of structures “distorted aggregates”.


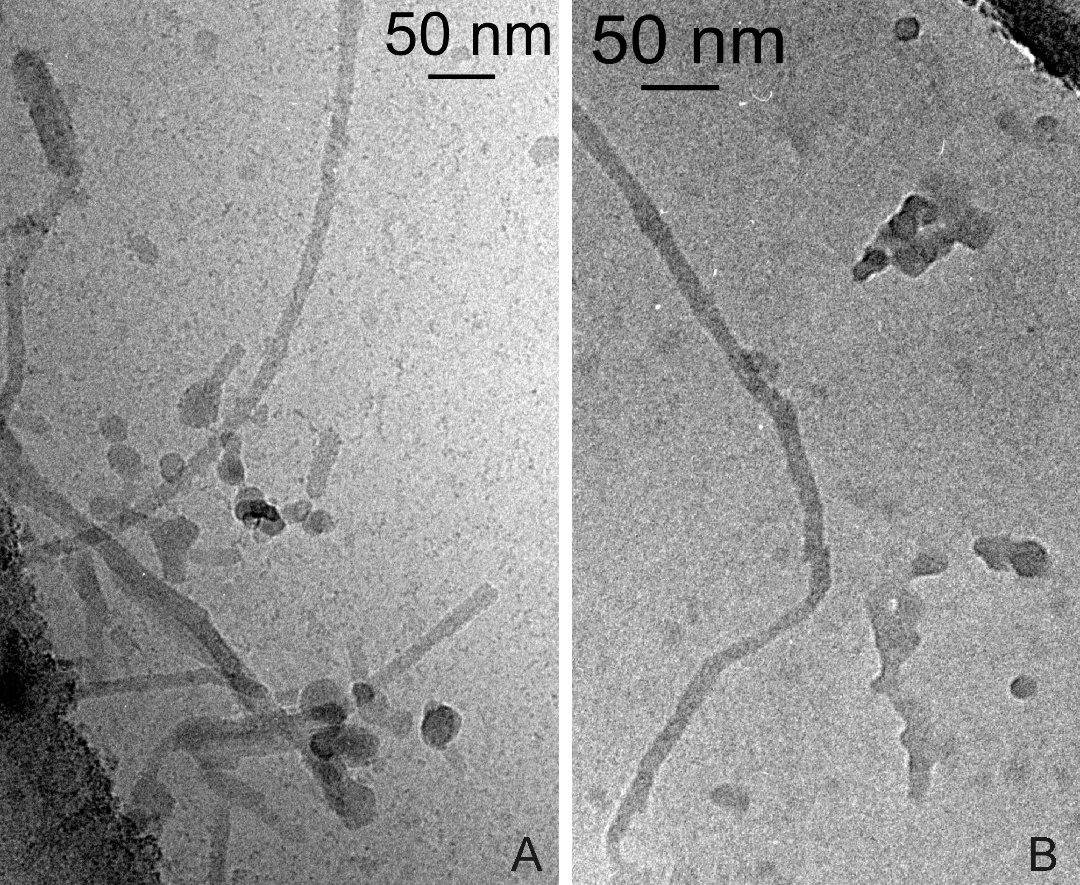


Figure S 11: Cryo-TEM images of 3.3·10-4 M C8S3 aggregate solution with 10-3 M solution of PAH added in equal volume. The tubular structure is no longer visible and has a similar appearance as shown in Figure S10b (insert).


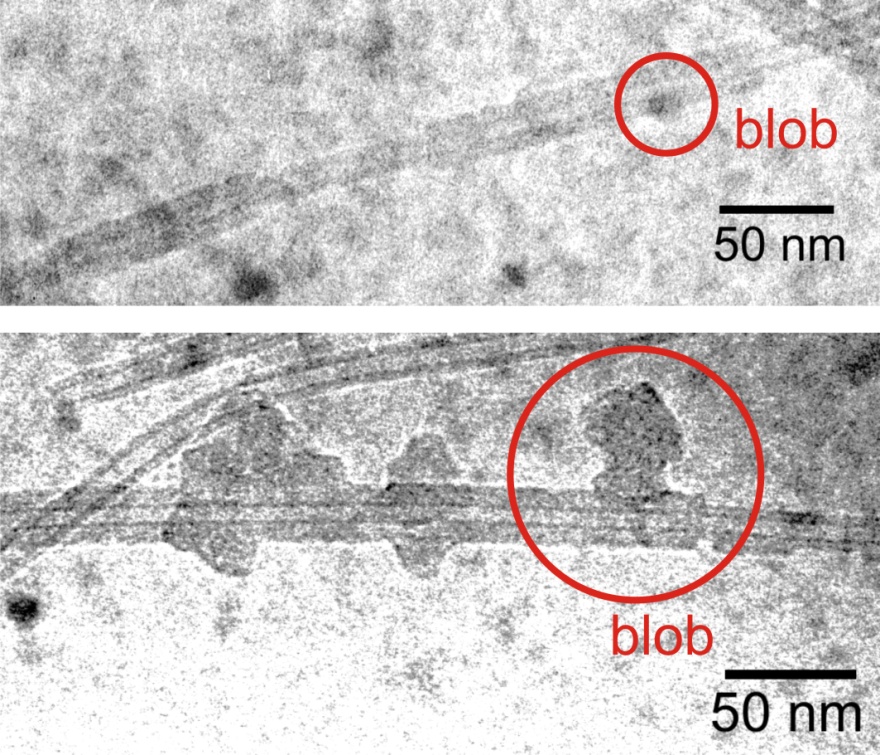


Figure S 12: Cryo-TEM images of 3.3·10-4 M C8S3 solution after addition of 10-4 M of low molecular weight PDADMAC (PDA100) solution. Pure aggregates (top of image) as well as aggregates decorated by blob-like structures and an additional double layer of dye are visible.

# Staining of C8S3/PDADMAC complexes with CdTe nanoparticles

In a previous publication by Y. Qiao et al. 5 aggregates covered by PDADMAC were stained with CdTe nanoparticles. This was done by adding 8 uL of 1 mM PDA100 (average MW 100 000 – 200 000, Sigma-Aldrich) to 100 uL of C8S3 J-aggregate solution to obtain a final PDADMAC concentration of approximately 10^-4 M. . The solution was kept in dark for 3 hours before adding 20 μL MPA-capped CdTe (PlasmaChem, Germany) QDs solution (0.5 mg/mL). The diameter of the CdTe nanoparticles is 2 – 3 nm. The final solution was stored in the dark for another 3 hours before measurements were performed. The MPA-capped CdTe particles are negatively charged and therefore do not adsorb directly on the negatively charged dye aggregate. In Figure S 13a an aggregate is shown where isolated PDADMAC chains decorated with CdTe particles are visible wrapping around the tubular aggregate. It is noticeable that no CdTe particles have adsorbed at the section with increased wall thickness. This was found repeatedly in various images. Hence, one may conclude that this area is still negatively charged and has no PDADMAC coverage. In Figure S 13b an aggregate is shown that is almost homogeneously covered with CdTe particles. Additionally, blobs are seen that are also covered by the particles. This implies that the surface charge of this aggregate was completely reversed by a layer of PDADMAC. Also the blobs are clearly identified as positively charged. The average diameter of the CdTe covered aggregate5 of 20.4±0.5 nm fits well to the outer diameter of the bare aggregate (13±0.5 nm) plus two times the diameter of the nanoparticles (3±0.5 nm). The thickness of the PDADMAC layer between aggregate and nanoparticles then has to be in the range of 1±0.5 nm.

No adsorption of CdTe particles

Blobs of PDADMAC covered with CdTe particles

PDADMAC with CdTe particles


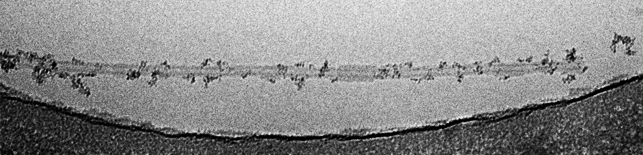

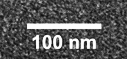

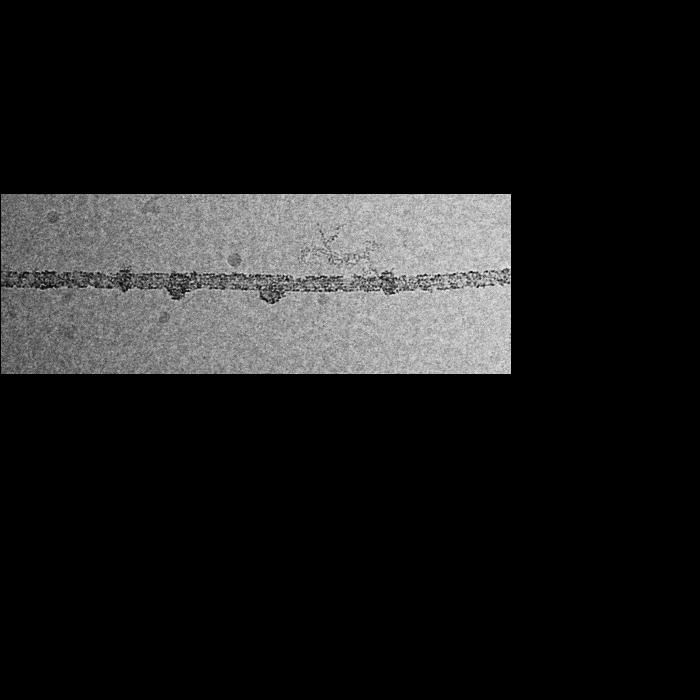

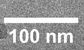


a

b

Figure S 13: Cryo-TEM images of C8S3 tubular aggregates covered with PDADMAC and stained with CdTe nanoparticles. (a) Aggregate wrapped by sporadic PDADMAC chains decorated with CdTe nanoparticles. The thickened section doesn’t show any adsorbed CdTe particles (images are courtesy of Y. Qiao and were already published in similar form in 5).

# Useful physical data of the polycations used

|  | PDAD100 | PDAD400 | PAH | PEI |
| --- | --- | --- | --- | --- |
| Average molecular weight Mw g/mol | 100000 | 400000 | 17000 | 60000 |
| Average number of monomers N | 620 | 2480 | 180 | 1360 |
| Molecular weight of monomer / g/mol | 161.6 | 161.6 | 93.5 | 44.1 – 472.7 |
| (α=1, fully charged) / nm | 0.5 | 0.5 | 0.226  (1.25 for 20% charged) | 0.38 |
| Line charge density τ (α=1, fully charged) / e/Å | 0.2 | 0.2 | 0.4 | 0.26 |
| pKa (pH for α=0.5) |  |  | 8.9 7 | 8.2 8 |
| Radius of gyration Rg / nm | 22 9 | 40 9 | 4.8 … 6 6  (pH=6 … 9),  10-2 M salt | 22 10  1 M salt |

# References

1. Eisele, D. M.; Arias, D. H.; Fu, X.; Bloemsma, E. A.; Steiner, C. P.; Jensen, R. A.; Rebentrost, P.; Eisele, H.; Tokmakoff, A.; Lloyd, S.; Nelson, K. A.; Nicastro, D.; Knoester, J.; Bawendi, M. G., Robust excitons inhabit soft supramolecular nanotubes. *Proceedings of the National Academy of Sciences* **2014,** *111* (33), E3367-E3375.

2. von Berlepsch, H.; Kirstein, S.; Hania, R.; Pugžlys, A.; Böttcher, C., Modification of the nanoscale structure of the J-aggregate of a sulfonate-substituted amphiphilic carbocyanine dye through incorporation of surface-active additives. *Journal of Physical Chemistry B* **2007,** *111* (7), 1701-1711.

3. Evans, F. D.; Wennerström, H., *The Colloidal domain : where physics, chemistry and biology meet*. 2 nd ed.; Wiley: 1999; p 672.

4. von Berlepsch, H.; Kirstein, S.; Hania, R.; Didraga, C.; Pugžlys, A.; Böttcher, C., Stabilization of individual tubular J-aggregates by poly(vinyl alcohol). *Journal of Physical Chemistry B* **2003,** *107* (51), 14176-14184.

5. Qiao, Y.; Polzer, F.; Kirmse, H.; Steeg, E.; Kühn, S.; Friede, S.; Kirstein, S.; Rabe, J.P., Nanotubular J-aggregates and quantum dots coupled for efficient resonance excitation energy transfer. *ACS nano* **2015,** *9* (2), 1552-1560.

6. Jachimska, B.; Jasiński, T.; Warszyński, P.; Adamczyk, Z., Conformations of poly (allylamine hydrochloride) in electrolyte solutions: Experimental measurements and theoretical modeling. *Colloids and Surfaces A: Physicochemical and Engineering Aspects* **2010,** *355* (1-3), 7-15.

7. Choi, J.; Rubner, M. F., Influence of the degree of ionization on weak polyelectrolyte multilayer assembly. *Macromolecules* **2005,** *38* (1), 116-124.

8. von Harpe, A.; Petersen, H.; Li, Y.; Kissel, T., Characterization of commercially available and synthesized polyethylenimines for gene delivery. *Journal of Controlled Release* **2000,** *69* (2), 309-322.

9. Dautzenberg, H.; Görnitz, E.; Jaeger, W., Synthesis and characterization of poly (diallyldimethylammonium chloride) in a broad range of molecular weight. *Macromolecular Chemistry and Physics* **1998,** *199* (8), 1561-1571.

10. Park, I. H.; Choi, E.-J., Characterization of branched polyethyleneimine by laser light scattering and viscometry. *Polymer* **1996,** *37* (2), 313-319.
